# Supplementary material for: Delayed respiratory syncytial virus epidemic in children after relaxation of COVID-19 physical distancing measures, Ashdod, Israel, 2021
Source: PubMed Central journal article supplement (PMC8299746; doi:10.2807/1560-7917.es.2021.26.29.2100706), 2021-07-22
Supplement: 21-00706_WEINBERGER-OPEK_SupplementaryTableS1.pdf [file 21-00706_WEINBERGER-OPEK_SupplementaryTableS1.pdf]

This supplementary material is hosted by *Eurosurveillance* as supporting information alongside the article "Delayed respiratory syncytial virus season in spring-summer after relaxation of COVID-19 social distancing restriction in Ashdod, Israel, 2021", on behalf of the authors, who remain responsible for the accuracy and appropriateness of the content. The same standards for ethics, copyright, attributions and permissions as for the article apply. Supplements are not edited by *Eurosurveillance* and the journal is not responsible for the maintenance of any links or email addresses provided therein.

**S1: Comparison of clinical characteristics between RSV cases of spring-summer 2021 and a random sample of comparison cases from autumn-winter seasons 2018-2020.**

|                                     |                                     | 2018-2020 comparison |    | 2021      |    | P value |
|-------------------------------------|-------------------------------------|----------------------|----|-----------|----|---------|
|                                     |                                     | n                    | %  | n         | %  |         |
| N                                   |                                     | 140                  |    | 70        |    |         |
| Comorbidities                       | Recurrent wheezing                  | 32                   | 23 | 16        | 23 | >0.99   |
|                                     | Congenital heart diseases           | 4                    | 3  | 2         | 3  | >0.99   |
|                                     | Atopic dermatitis                   | 6                    | 4  | 3         | 4  | 1.0     |
|                                     | Bronchopulmonary dysplasia          | 2                    | 1  | 0         | 0  | 0.55    |
|                                     | Neurological or muscular diseases   | 7                    | 5  | 0         | 0  | 0.1     |
| Prematurity                         | Any                                 | 17                   | 12 | 4         | 6  | 0.22    |
|                                     | 33-36 w                             | 14                   | 10 | 4         | 6  |         |
|                                     | 29-32 w                             | 3                    | 2  | 0         | 0  |         |
|                                     | ≤28 w                               | 0                    | 0  | 0         | 0  |         |
| Length of stay - median (IQR), days |                                     | 3 (2-5)              |    | 3 (1-6)   |    | 0.39    |
| ICU admission                       | Overall                             | 31                   | 22 | 21        | 30 | 0.24    |
|                                     | Length of stay - median (IQR), days | 3 (2-4)              |    | 3 (2.5-5) |    | 0.32    |
| Clinical manifestations             | Fever                               | 117                  | 84 | 52        | 74 | 0.14    |
|                                     | Cough                               | 128                  | 91 | 68        | 97 | 0.15    |
|                                     | Tachypnea±dyspnea                   | 110                  | 79 | 57        | 81 | 0.72    |
| Respiratory support                 | Oxygen supplementation              | 71                   | 51 | 38        | 54 | 0.66    |
|                                     | HFNC                                | 30                   | 21 | 20        | 29 | 0.3     |
|                                     | Mechanical ventilation              | 6                    | 4  | 2         | 3  | 0.72    |
| Intravenous hydration               |                                     | 94                   | 67 | 44        | 63 | 0.54    |
| Antimicrobial treatment             |                                     | 88                   | 63 | 39        | 56 | 0.37    |
| Coinfection with other viruses      | Positive PCR - N/number tested      | 11/38                | 29 | 9/23      | 45 | 0.57    |
|                                     | Adenovirus                          | 4/38                 | 10 | 5/23      | 22 |         |
|                                     | Enterovirus                         | 2/38                 | 5  | 2/23      | 9  |         |
|                                     | hMPV                                | 0/38                 | 0  | 1         | 4  |         |
|                                     | PI3                                 | 1/38                 | 3  | 1         | 4  |         |
|                                     | Influenza A                         | 1/38                 | 3  | 0         | 0  |         |

Abbreviations: IQR, interquartile range; ICU, intensive care unit; HFNC, high flow nasal canula support; PCR, polymerase chain reaction; hMPV, human metapneumovirus; PI3, parainfluenza virus 3.
